# Supplementary material for: Structural Characterization of a Polygonatum cyrtonema Hua Tuber Polysaccharide and Its Contribution to Moisture Retention and Moisture-Proofing of Porous Carbohydrate Material
Source: MDPI journal article supplement (doi:10.3390/molecules27155015), 2022-08-06
Supplement: s1 [file s1]

## Supplementary Data

### Structural Characterization of a *Polygonatum cyrtonema* Hua Tuber Polysaccharide and Its Contribution to Moisture Retention and Moisture-Proofing of Porous Carbohydrate Material

Ling Yu <sup>1\*</sup>, Yipeng Wang <sup>1</sup>, Qingjiu Tang <sup>2</sup>, Rongrong Zhang <sup>1</sup>, Danyu Zhang <sup>1</sup> and  
Guangyong Zhu <sup>1</sup>

<sup>1</sup> School of Perfume and Aroma Technology, Shanghai Institute of Technology,  
Shanghai 201418, China

<sup>2</sup> Institute of Edible Fungi, Shanghai Academy of Agricultural Sciences, Shanghai  
201403, China

\*Corresponding author: Ling Yu

Address: Department of Perfume and Aroma Technology, Shanghai Institute of  
Technology, No. 100 Haiquan Road, Shanghai, 201418, People's Republic of China

## Contents:

**Table S1.** Analysis on the effect of PCP 85-1-1 on the aroma change of tobacco shreds.

| Number | Volatile compounds                            | Control<br>(µg/g) | Glycerol<br>(µg/g) | PCP 85 – 1 – 1<br>(µg/g) |
|--------|-----------------------------------------------|-------------------|--------------------|--------------------------|
|        | Nitrogenous                                   |                   |                    |                          |
| 1      | L-Nicotine                                    | 2472.44           | 1551.27            | 1886.85                  |
| 2      | 2,3-Dipyridyl                                 | 20.78             | 16.37              | 21.14                    |
| 3      | Indole                                        | 7.33              | 9.68               | 11.09                    |
| 4      | 3-(1-methyl-2-pyrrolidinyl)-,<br>(S)-Pyridine | 15.63             | -                  | -                        |
| 5      | 3-Methylindole                                | 14.49             | 11.99              | 10.85                    |
| 6      | Pyrido[2,3-b] pyrazine                        | 20.78             | 16.37              | 21.14                    |
| 7      | 9H-Pyrido[3,4-b] indole                       | 20.20             | 9.03               | 11.87                    |
|        | total                                         | 2571.65           | 1614.71            | 1962.931                 |
|        | Furans                                        |                   |                    |                          |
| 8      | Furfural                                      | 14.43             | 19.21              | 27.06                    |
| 9      | Furfuryl alcohol                              | -                 | 7.39               | 10.93                    |
| 10     | 5-Methyl-2-furfural                           | 12.97             | 14.73              | 15.71                    |
| 11     | 5-Hydroxymethylfurfural                       | 265.82            | 238.78             | 251.57                   |
|        | total                                         | 293.21            | 280.10             | 305.25                   |
|        | Alcohols                                      |                   |                    |                          |
| 12     | Farnesol                                      | 11.48             | 14.5               | 15.61                    |
| 13     | (Z, Z, Z)-9,12,15-<br>Octadecatrien-1-ol      | 89.6              | 87.76              | 80.69                    |
| 14     | trans-Geranylgeraniol                         | 32.44             | 20.56              | 21.8                     |
|        | total                                         | 133.51            | 122.81             | 118.1                    |
|        | Phenols                                       |                   |                    |                          |
| 15     | Phenol                                        | 39.23             | 42.17              | 48.82                    |
| 16     | o-Cresol                                      | 21.54             | 23.71              | 21.04                    |
| 17     | 4-methyl-Phenol                               | 32.58             | 35.94              | 40.8                     |
| 18     | Maltol                                        | 12.22             | 11.92              | 13.04                    |
| 19     | 4-ethyl-Phenol,                               | 8.82              | 17.43              | 16.45                    |
| 20     | 1,2-Benzenediol                               | 125.70            | 102.71             | 139.85                   |
| 21     | 2-Isopropoxyphenol                            | 17.38             | 14.41              | 13.71                    |
| 22     | 1,4-Benzenediol                               | 33.20             | 31                 | 63.70                    |
| 23     | 2-Methoxy-4-vin                               | 8.02              | 10.5               | 10.89                    |
| 24     | 2,6-Dimethoxyphenol                           | 2.44              | 4.3                | -                        |
| 25     | 4-Ethylcatechol                               | 19.84             | 21.77              | 25.37                    |
|        | total                                         | 320.96            | 315.86             | 393.65                   |

|    |                                                             |        |        |        |
|----|-------------------------------------------------------------|--------|--------|--------|
|    | Ketones                                                     |        |        |        |
| 26 | 2-methyl-2-Cyclopenten-1-one                                | 2.33   | 4.15   | -      |
| 27 | 3-Hexene-2,5-dione                                          | 13.04  | 22.27  | 26.11  |
| 28 | 3-methyl-2-Cyclopenten-1-one                                | 15.04  | 16.27  | 19.34  |
| 29 | 2-hydroxy-3-methyl-2-Cyclopenten-1-one,                     | 26.07  | 24.4   | 26.99  |
| 30 | 2,3-Dimethyl-2-cyclopentenyl phenol-1-one                   | 7.17   | 7.81   | 5.8    |
| 31 | 2,3-Dihydro-3,5-dihydroxy-6-methyl-4H-pyran-4-one           | 58.38  | 67.86  | 86.21  |
| 32 | 3,5-dihydroxy-2-methyl-4H-Pyran-4-one,                      | 17.25  | 10     | 14.04  |
| 33 | Megastigmatrienone 2                                        | 7.17   | 8.53   | 9.23   |
| 34 | 4-(3-hydroxy-1-butenyl)-3,5,5-trimethyl-2-Cyclohexene-1-one | 19.73  | 20.34  | 22.5   |
| 35 | 1-(2,4,5-triethylphenyl)-ethanone                           | 7.78   | 8.99   | 9.31   |
| 36 | 2,3,6-trimethyl-1,4-Naphthalenedione                        | 9.10   | 5.87   | 6.01   |
| 37 | Scopoletin                                                  | 51.45  | 42.42  | 49.27  |
|    | total                                                       | 234.50 | 238.98 | 274.8  |
|    | Acids                                                       |        |        |        |
| 38 | 2-Furancarboxylic acid                                      | 8.25   | -      | -      |
| 39 | Benzoic acid                                                | 8.79   | 14.56  | 17.19  |
| 40 | Phenylacetic acid                                           | 12.37  | 21.24  | 12.67  |
| 41 | Tetradecanoic acid                                          | 4.27   | 4.05   | -      |
| 42 | n-Hexadecanoic acid                                         | 201.54 | 183.59 | 176.91 |
| 43 | (Z, Z)-9,12-Octadecadienoic acid                            | 28.12  | 27.9   | 21.95  |
| 44 | Octadecanoic acid                                           | 36.68  | 23.96  | 20.81  |
|    | total                                                       | 300.02 | 275.3  | 249.54 |
|    | Esters                                                      |        |        |        |
| 45 | Triacetin                                                   | 286.41 | 276.46 | 294.6  |
| 46 | Diisobutyl phthalate                                        | 14.73  | 5.9    | -      |
| 47 | Methyl palmitate                                            | 11.16  | 10.79  | 11.07  |
| 48 | P-propylene benzaldehyde acetal                             | 58.3   | 24.68  | 19.36  |
|    | total                                                       | 370.6  | 317.83 | 325.03 |
|    | Hydrocarbons                                                |        |        |        |
| 49 | Toluene                                                     | 33.55  | 68.57  | 119.09 |
| 50 | 1,3-dimethyl-Benzene                                        | 18.26  | 22.25  | 33.67  |
| 51 | $\beta$ -Pinene                                             | 14.23  | -      | -      |
| 52 | 1-methyl-2-(1-methylethyl)-                                 | 8.34   | 10.71  | 10.05  |

|    |                                    |         |         |         |
|----|------------------------------------|---------|---------|---------|
|    | Benzene                            |         |         |         |
| 53 | Dl-limonene                        | 34.71   | 43.43   | 44.62   |
| 54 | 2-methyl- Naphthalene              | 7.86    | 12.09   | 15.63   |
| 55 | Caryophyllene                      | 73.73   | 51.61   | 36.12   |
| 56 | o-Hydroxybiphenyl                  | 12.52   | 15.63   | 10.00   |
| 57 | 1-methyl-2-pentyl-<br>Cyclopropane | 16.68   | 18.33   | 18.65   |
| 58 | Neophytadiene                      | 122.17  | 121.08  | 133.58  |
| 59 | Aciphyllene                        | 15.77   | 16.11   | 13.44   |
| 60 | Heptadecane                        | 6.70    | 9.99    | 10.13   |
| 61 | Eicosane                           | 37.86   | 30.08   | 36.60   |
| 62 | Heneicosane                        | 24.73   | 21.84   | 24.64   |
|    | total                              | 427.12  | 441.72  | 506.72  |
|    | Total volatile compounds           | 4651.61 | 3607.35 | 4135.55 |

---
